# Supplementary material
Source: Springer Nature journal article supplement (https://www.springermedizin.de/resource/supplementary/12958_2011_923_MOESM1_ESM.pdf/9568838)
Supplement: MOESM1 [file 9568838]

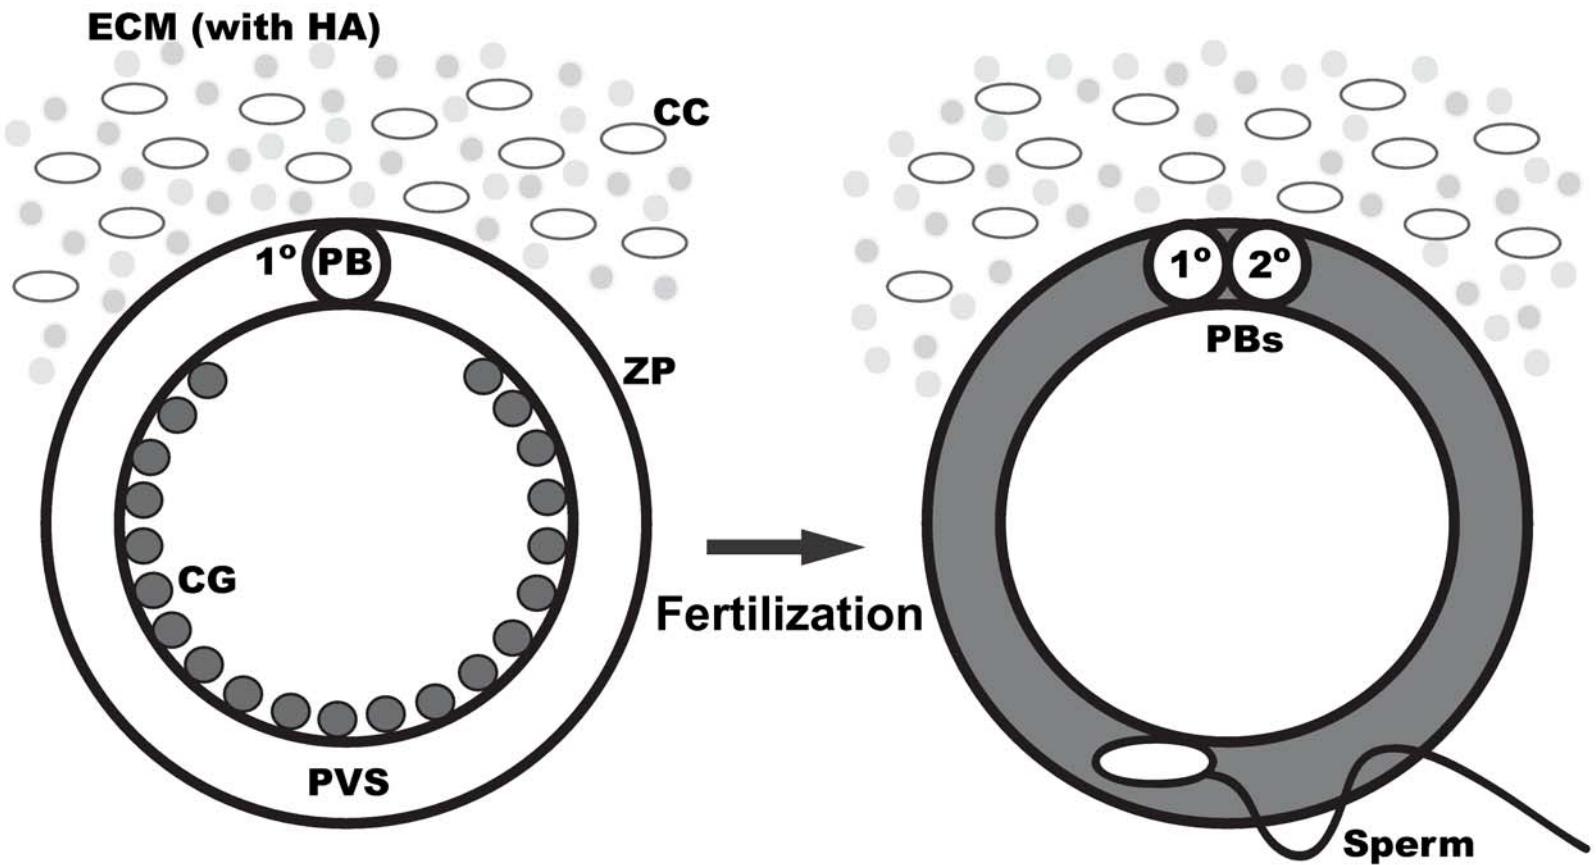

CC = cumulus cells

CG = cortical granules

ECM = extracellular matrix

HA = hyaluronic acid

1° PB = primary polar body

2° PB = secondary polar body

PVS = perivitelline space

ZP = zona pellucida
